# Supplementary material for: Long-term efficacy and safety of siponimod in patients with secondary progressive multiple sclerosis: Analysis of EXPAND core and extension data up to >5 years
Source: PubMed Central journal article supplement (PMC9315196; doi:10.1177/13524585221083194), 2022-04-05
Supplement: sj-pdf-9-msj-10.1177_13524585221083194.pdf [file sj-pdf-9-msj-10.1177_13524585221083194.pdf]

## MS Journal Appendix for MRI methodology

| Hardware                          |                                                             |
|-----------------------------------|-------------------------------------------------------------|
| Field strength                    | 1.5 Tesla or 3.0 Tesla                                      |
| Manufacturer                      | Various scanners used by NeuroRX, Montreal, Canada, H2X 3P9 |
| Model                             | Various software used by NeuroRX, Montreal, Canada, H2X 3P9 |
| Coil type<br>(e.g. head, surface) |                                                             |
| Number of coil channels           |                                                             |

| Acquisition sequence                                              |                                                                                                                                                                                |
|-------------------------------------------------------------------|--------------------------------------------------------------------------------------------------------------------------------------------------------------------------------|
| Type<br>(e.g. FLAIR, DIR, DTI, fMRI)                              | PD-weighted, T2-weighted, FLAIR                                                                                                                                                |
| Acquisition time                                                  |                                                                                                                                                                                |
| Orientation                                                       | True mid-line sagittal                                                                                                                                                         |
| Alignment<br>(e.g. anterior commissure/poster<br>commissure line) | Indicated lesions were checked for correspondence to a<br>lesion on at least one of the appropriate images, and it<br>was ensured that the lesion was completely within tissue |
| Voxel size                                                        |                                                                                                                                                                                |
| TR                                                                |                                                                                                                                                                                |
| TE                                                                |                                                                                                                                                                                |
| TI                                                                |                                                                                                                                                                                |
| Flip angle                                                        |                                                                                                                                                                                |
| NEX                                                               |                                                                                                                                                                                |
| Field of view                                                     |                                                                                                                                                                                |
| Matrix size                                                       |                                                                                                                                                                                |
| Parallel imaging                                                  | No                                                                                                                                                                             |
| If used, parallel imaging method:<br>(e.g. SENSE, GRAPPA)         |                                                                                                                                                                                |
| Cardiac gating                                                    | No                                                                                                                                                                             |
| If used, cardiac gating method:<br>(e.g. PPU or ECG)              |                                                                                                                                                                                |
| Contrast enhancement                                              | No                                                                                                                                                                             |

**Acquisition sequence**

If used, provide name of contrast agent, dose and timing of scan post-contrast administration

N/A

Other parameters:

N/A

| <b>Image analysis methods and outputs</b>                                                                                                      |                                                                                                                                                                               |
|------------------------------------------------------------------------------------------------------------------------------------------------|-------------------------------------------------------------------------------------------------------------------------------------------------------------------------------|
| <b>Lesions</b>                                                                                                                                 |                                                                                                                                                                               |
| Type<br>(e.g. Gd-enhancing, T2-hyperintense, T1-hypointense)                                                                                   | T2 new/englarging, T2 lesion volume change                                                                                                                                    |
| Analysis method                                                                                                                                | An initial segmentation of the scan was carried out based on a set of starting labels provided by software that employs a Bayesian classifier with anatomical prior knowledge |
| Analysis software                                                                                                                              |                                                                                                                                                                               |
| Output measure<br>(e.g. count or volume [ml])                                                                                                  |                                                                                                                                                                               |
| <b>Tissue volumes</b>                                                                                                                          |                                                                                                                                                                               |
| Type<br>(e.g. whole brain, grey matter, white matter, spinal cord)                                                                             | Total brain, cortical grey matter, thalamic volume                                                                                                                            |
| Analysis method                                                                                                                                |                                                                                                                                                                               |
| Analysis software                                                                                                                              | JacobianAtrophy software (Nakamura et al., 2013)                                                                                                                              |
| Output measure<br>(e.g. absolute tissue volume in ml, tissue volume as a fraction of intracranial volume, percentage change in tissue volumes) |                                                                                                                                                                               |
| <b>Tissue measures (e.g. MTR, DTI, T1-RT, T2-RT, T2*, T2', <sup>1</sup>H-MRS, perfusion, Na)</b>                                               |                                                                                                                                                                               |
| Type<br>(e.g. whole brain, grey matter, white matter, spinal cord, normal-appearing grey matter or white matter)                               | N/A                                                                                                                                                                           |
| Analysis method                                                                                                                                |                                                                                                                                                                               |
| Analysis software                                                                                                                              |                                                                                                                                                                               |
| Output measure                                                                                                                                 |                                                                                                                                                                               |
| <b>Other MRI measures (e.g. functional MRI)</b>                                                                                                |                                                                                                                                                                               |
| Type<br>(e.g. whole brain, grey matter, white matter, spinal cord, normal-appearing grey matter or white matter)                               | N/A                                                                                                                                                                           |
| Analysis method                                                                                                                                |                                                                                                                                                                               |
| Analysis software                                                                                                                              |                                                                                                                                                                               |
| Output measure                                                                                                                                 |                                                                                                                                                                               |

**Other analysis details:**
